# Supplementary material for: Determination and Quantification of Phytochemicals from the Leaf Extract of Parthenium hysterophorus L. and Their Physio-Biochemical Responses to Several Crop and Weed Species
Source: MDPI journal article supplement (doi:10.3390/plants11233209), 2022-11-23
Supplement: s1 [file s1]

**Table S1.** Percent reduction of chlorophyll-a and chlorophyll-b content to a foliar spray of *P. hysterophorus* leaf extract of some crops and weeds comparison with control.

| Test Plants                | Concentration (g L <sup>-1</sup> ) | Chlorophyll-a (mg g <sup>-1</sup> FW) |        |        |        | Chlorophyll-b (mg g <sup>-1</sup> FW) |        |        |        |
|----------------------------|------------------------------------|---------------------------------------|--------|--------|--------|---------------------------------------|--------|--------|--------|
|                            |                                    | Hours after Spray                     |        |        |        | Hours after Spray                     |        |        |        |
|                            |                                    | 6                                     | 24     | 48     | 72     | 6                                     | 24     | 48     | 72     |
| Bambara groundnut          | 0                                  | 0                                     | 0      | 0      | 0      | 0                                     | 0      | 0      | 0      |
|                            | 25                                 | 0                                     | 3.16   | 1.97   | 3.41   | 0.25                                  | 2.87   | 1.57   | 0.51   |
|                            | 50                                 | 8.64                                  | 7.59   | 8.22   | 5.11   | 13.04                                 | 14.09  | 14.21  | 9.48   |
|                            | 75                                 | 15.43                                 | 9.81   | 14.14  | 12.28  | 15.60                                 | 18.27  | 19.73  | 12.05  |
|                            | 100                                | 18.51                                 | 14.55  | 25.32  | 25.25  | 17.64                                 | 21.93  | 22.63  | 15.89  |
| Maize                      | 0                                  | 0                                     | 0      | 0      | 0      | 0                                     | 0      | 0      | 0      |
|                            | 25                                 | 6.75                                  | 1.90   | 3.65   | 1.16   | 1.82                                  | 3.92   | 5.87   | 3.27   |
|                            | 50                                 | 7.07                                  | 7.63   | 6.50   | 6.20   | 3.44                                  | 7.64   | 10.12  | 7.58   |
|                            | 75                                 | 8.68                                  | 11.06  | 9.34   | 8.91   | 3.84                                  | 10.33  | 16.39  | 11.06  |
|                            | 100                                | 18.32                                 | 12.97  | 13.82  | 12.01  | 10.12                                 | 14.46  | 18.82  | 12.29  |
| <i>D. sanguinalis</i>      | 0                                  | 0                                     | 0      | 0      | 0      | 0                                     | 0      | 0      | 0      |
|                            | 25                                 | 9.43                                  | 8.55   | 4.33   | 5.92   | 4.99                                  | 9.43   | 10.36  | 21.15  |
|                            | 50                                 | 15.72                                 | 12.82  | 28.74  | 33.59  | 12.65                                 | 30.07  | 30.22  | 40.94  |
|                            | 75                                 | 24.84                                 | 22.36  | 49.60  | 50.98  | 40.28                                 | 48.04  | 54.13  | 66.15  |
|                            | 100                                | 36.79                                 | 52.96  | 61.02  | 79.84  | 56.50                                 | 70.64  | 73.81  | 81.55  |
| <i>E. indica</i>           | 0                                  | 0                                     | 0      | 0      | 0      | 0                                     | 0      | 0      | 0      |
|                            | 25                                 | 3.22                                  | 18.09  | 17.43  | 30.82  | 19.12                                 | 20.21  | 24.05  | 37.47  |
|                            | 50                                 | 13.54                                 | 20.06  | 27.75  | 62.72  | 23.50                                 | 32.91  | 36.08  | 42.41  |
|                            | 75                                 | 18.06                                 | 35.19  | 56.93  | 69.53  | 31.75                                 | 35.42  | 48.47  | 60.47  |
|                            | 100                                | 33.22                                 | 57.56  | 66.54  | 78.85  | 51.05                                 | 51.87  | 72.17  | 80.91  |
| <i>Ageratum conyzoides</i> | 0                                  | 0                                     | 0      | 0      | 0      | 0                                     | 0      | 0      | 0      |
|                            | 25                                 | 10.29                                 | 46.62  | 46.64  | 56.14  | 5.20                                  | 19.10  | 17.44  | 30.00  |
|                            | 50                                 | 32.89                                 | 51.35  | 55.12  | 61.75  | 22.91                                 | 21.34  | 22.09  | 39.00  |
|                            | 75                                 | 40.53                                 | 55.40  | 60.42  | 65.96  | 42.70                                 | 38.20  | 43.02  | 55.00  |
|                            | 100                                | 43.18                                 | 58.78  | 63.60  | 71.22  | 48.95                                 | 49.43  | 54.65  | 74.00  |
| <i>iría</i>                | 0                                  | 0                                     | 0      | 0      | 0      | 0                                     | 0      | 0      | 0      |
|                            | 25                                 | 1.82                                  | 0.65   | 0.39   | 11.33  | 28.61                                 | 36.33  | 46.29  | 51.97  |
|                            | 50                                 | 3.04                                  | 3.25   | 4.74   | 24.00  | 48.50                                 | 50.54  | 52.68  | 59.10  |
|                            | 75                                 | 8.23                                  | 7.81   | 15.81  | 65.33  | 52.58                                 | 58.19  | 61.89  | 62.53  |
|                            | 100                                | 24.69                                 | 28.33  | 58.89  | 72.00  | 52.58                                 | 62.56  | 66.49  | 68.33  |
| <i>E. hitra</i>            | 0                                  | 0                                     | 0      | 0      | 0      | 0                                     | 0      | 0      | 0      |
|                            | 25                                 | 130.08                                | 131.48 | 130.20 | 107.57 | 122.90                                | 119.39 | 118.37 | 116.14 |
|                            | 50                                 | 130.89                                | 135.18 | 132.29 | 115.90 | 129.95                                | 128.87 | 125.64 | 123.31 |

| Test Plants         | Concentration (g<br>L <sup>-1</sup> ) | Chlorophyll-a (mg g <sup>-1</sup> FW) |        |        |        | Chlorophyll-b (mg g <sup>-1</sup> FW) |        |        |        |
|---------------------|---------------------------------------|---------------------------------------|--------|--------|--------|---------------------------------------|--------|--------|--------|
|                     |                                       | Hours after Spray                     |        |        |        | Hours after Spray                     |        |        |        |
|                     |                                       | 6                                     | 24     | 48     | 72     | 6                                     | 24     | 48     | 72     |
|                     |                                       |                                       |        |        |        |                                       |        |        |        |
| <i>C. difformis</i> | 75                                    | 133.33                                | 139.81 | 145.83 | 120.45 | 137.00                                | 130.17 | 126.49 | 124.66 |
|                     | 100                                   | 152.03                                | 156.48 | 160.41 | 125.00 | 139.64                                | 135.34 | 129.91 | 130.94 |
|                     | 0                                     | 0                                     | 0      | 0      | 0      | 0                                     | 0      | 0      | 0      |
|                     | 25                                    | 8.33                                  | 6.05   | 1.84   | 1.31   | 0.34                                  | 2.93   | 1.74   | 1.39   |
|                     | 50                                    | 10.41                                 | 5.73   | 2.95   | 2.63   | 3.84                                  | 8.79   | 9.09   | 8.74   |
|                     | 75                                    | 10.71                                 | 11.78  | 7.01   | 7.23   | 8.74                                  | 12.82  | 15.38  | 15.03  |
|                     | 100                                   | 13.98                                 | 21.33  | 27.67  | 17.43  | 13.28                                 | 17.58  | 25.87  | 23.07  |

**Table S2.** Percent reduction of total chlorophyll content and carotenoids to a foliar spray of *P. hysterophorus* leaf extract of some crops and weeds compare with control.

| Test Plants                    | Concentration<br>(g L <sup>-1</sup> ) | Total Chlorophyll (mg g <sup>-1</sup> FW) |        |        |        | Carotenoids (mg g <sup>-1</sup> FW) |        |        |        |
|--------------------------------|---------------------------------------|-------------------------------------------|--------|--------|--------|-------------------------------------|--------|--------|--------|
|                                |                                       | Hours after Spray                         |        |        |        | Hours after Spray                   |        |        |        |
|                                |                                       | 6                                         | 24     | 48     | 72     | 6                                   | 24     | 48     | 72     |
| Bambara<br>Groundnut           | 0                                     | 0                                         | 0      | 0      | 0      | 0                                   | 0      | 0      | 0      |
|                                | 25                                    | 0.13                                      | 3.00   | 1.75   | 1.75   | 1.28                                | 3.22   | 5.00   | 5.16   |
|                                | 50                                    | 11.04                                     | 11.15  | 11.54  | 7.61   | 7.05                                | 10.96  | 12.14  | 12.90  |
|                                | 75                                    | 15.52                                     | 14.44  | 17.25  | 12.15  | 10.89                               | 14.83  | 17.85  | 17.41  |
|                                | 100                                   | 18.04                                     | 18.59  | 23.84  | 19.91  | 15.38                               | 20.64  | 20.71  | 20.64  |
| Maize                          | 0                                     | 0                                         | 0      | 0      | 0      | 0                                   | 0      | 0      | 0      |
|                                | 25                                    | 3.72                                      | 3.21   | 5.13   | 2.54   | 2.95                                | 3.59   | 5.52   | 2.95   |
|                                | 50                                    | 4.84                                      | 7.64   | 8.91   | 7.10   | 5.32                                | 7.18   | 11.65  | 8.28   |
|                                | 75                                    | 5.71                                      | 10.58  | 14.05  | 10.32  | 10.05                               | 14.97  | 17.79  | 13.60  |
|                                | 100                                   | 13.29                                     | 13.94  | 17.16  | 12.19  | 13.60                               | 19.76  | 20.85  | 18.34  |
| <i>D. sanguinalis</i>          | 0                                     | 0                                         | 0      | 0      | 0      | 0                                   | 0      | 0      | 0      |
|                                | 25                                    | 6.70                                      | 9.22   | 8.50   | 16.68  | 16.18                               | 17.64  | 21.05  | 22.67  |
|                                | 50                                    | 13.86                                     | 24.10  | 31.34  | 37.27  | 28.90                               | 31.17  | 40.93  | 45.34  |
|                                | 75                                    | 35.11                                     | 38.63  | 52.61  | 61.53  | 43.35                               | 50.00  | 70.76  | 72.67  |
|                                | 100                                   | 49.43                                     | 64.47  | 69.86  | 81.06  | 53.75                               | 68.82  | 77.19  | 93.60  |
| <i>E. indica</i>               | 0                                     | 0                                         | 0      | 0      | 0      | 0                                   | 0      | 0      | 0      |
|                                | 25                                    | 15.11                                     | 17.61  | 21.71  | 35.33  | 0.78                                | 5.6    | 3.27   | 19.04  |
|                                | 50                                    | 19.88                                     | 28.50  | 35.44  | 46.88  | 13.38                               | 17.6   | 23.77  | 35.71  |
|                                | 75                                    | 26.93                                     | 35.22  | 51.31  | 63.27  | 30.70                               | 37.6   | 50.81  | 62.69  |
|                                | 100                                   | 45.90                                     | 52.60  | 70.16  | 80.25  | 34.64                               | 59.2   | 61.47  | 75.39  |
| <i>Ageratum<br/>conyzoides</i> | 0                                     | 0                                         | 0      | 0      | 0      | 0                                   | 0      | 0      | 0      |
|                                | 25                                    | 14.69                                     | 34.27  | 40.48  | 50.00  | 9.40                                | 25.00  | 31.03  | 35.89  |
|                                | 50                                    | 29.63                                     | 43.81  | 46.91  | 52.84  | 22.22                               | 37.93  | 43.96  | 47.86  |
|                                | 75                                    | 39.43                                     | 52.06  | 56.56  | 62.95  | 35.04                               | 37.93  | 44.82  | 52.99  |
|                                | 100                                   | 45.61                                     | 55.92  | 60.05  | 71.76  | 41.02                               | 53.44  | 63.79  | 70.08  |
| <i>C. iria</i>                 | 0                                     | 0                                         | 0      | 0      | 0      | 0                                   | 0      | 0      | 0      |
|                                | 25                                    | 15.97                                     | 19.91  | 28.26  | 33.87  | 3.12                                | 17.72  | 24.67  | 36.25  |
|                                | 50                                    | 27.05                                     | 28.97  | 33.85  | 43.59  | 23.75                               | 25.94  | 29.22  | 40.00  |
|                                | 75                                    | 31.65                                     | 37.59  | 46.42  | 62.59  | 36.87                               | 41.13  | 56.49  | 69.37  |
|                                | 100                                   | 39.42                                     | 44.42  | 61.64  | 69.80  | 42.50                               | 55.06  | 68.83  | 73.12  |
| <i>E. hitra</i>                | 0                                     | 0                                         | 0      | 0      | 0      | 0                                   | 0      | 0      | 0      |
|                                | 25                                    | 123.07                                    | 123.46 | 123.93 | 112.92 | 111.39                              | 115.38 | 106.66 | 103.75 |
|                                | 50                                    | 130.48                                    | 130.79 | 127.87 | 120.50 | 113.92                              | 114.10 | 108.00 | 106.25 |





| Test Plants                | Concentration<br>(g L <sup>-1</sup> ) | Malondialdehyde Content (μmol g <sup>-1</sup> FW) |           |            |           | Proline Content (μmol g <sup>-1</sup> FW) |          |           |          |
|----------------------------|---------------------------------------|---------------------------------------------------|-----------|------------|-----------|-------------------------------------------|----------|-----------|----------|
|                            |                                       | Hours after Spray                                 |           |            |           | Hours after Spray                         |          |           |          |
|                            |                                       | 6                                                 | 24        | 48         | 72        | 6                                         | 24       | 48        | 72       |
|                            | 25                                    | 17.948718                                         | 60.97561  | 123.529412 | 148.48485 | 22.262774                                 | 62.35294 | 67.322835 | 210.3586 |
|                            | 50                                    | 56.410256                                         | 73.170732 | 167.647059 | 242.42424 | 41.605839                                 | 130.5882 | 210.62992 | 293.6255 |
|                            | 75                                    | 120.51282                                         | 156.09756 | 267.647059 | 290.90909 | 95.985401                                 | 203.9216 | 329.52756 | 372.51   |
|                            | 100                                   | 194.87179                                         | 246.34146 | 355.882353 | 409.09091 | 130.29197                                 | 241.5686 | 374.80315 | 478.8845 |
|                            |                                       |                                                   |           |            |           |                                           |          |           |          |
| <i>E. indica</i>           | 0                                     | 0                                                 | 0         | 0          | 0         | 0                                         | 0        | 0         | 0        |
|                            | 25                                    | 70.37037                                          | 144.44444 | 200        | 272       | 13                                        | 30.73394 | 117.28972 | 131.2796 |
|                            | 50                                    | 107.40741                                         | 188.88889 | 259.259259 | 412       | 74                                        | 94.0367  | 237.85047 | 313.2701 |
|                            | 75                                    | 244.44444                                         | 274.07407 | 403.703704 | 516       | 107.5                                     | 161.9266 | 292.52336 | 411.8483 |
|                            | 100                                   | 285.18519                                         | 459.25926 | 496.296296 | 596       | 178.5                                     | 217.4312 | 386.91589 | 492.891  |
| <i>Ageratum conyzoides</i> | 0                                     | 0                                                 | 0         | 0          | 0         | 0                                         | 0        | 0         | 0        |
|                            | 25                                    | 21.73913                                          | 108.69565 | 145.454545 | 154.54545 | 12.850467                                 | 15.6044  | 90.652174 | 148.4848 |
|                            | 50                                    | 91.304348                                         | 182.6087  | 218.181818 | 227.27273 | 48.130841                                 | 58.68132 | 159.34783 | 199.1342 |
|                            | 75                                    | 121.73913                                         | 269.56522 | 313.636364 | 327.27273 | 101.63551                                 | 170.5495 | 190       | 280.303  |
|                            | 100                                   | 200                                               | 317.3913  | 363.636364 | 404.54545 | 128.27103                                 | 210.1099 | 312.17391 | 377.7056 |
| <i>C. iria</i>             | 0                                     | 0                                                 | 0         | 0          | 0         | 0                                         | 0        | 0         | 0        |
|                            | 25                                    | 16.666667                                         | 25        | 50         | 100       | 12.264151                                 | 36.84211 | 46.445498 | 57.47664 |
|                            | 50                                    | 83.333333                                         | 150       | 175        | 241.66667 | 47.169811                                 | 89.03509 | 132.70142 | 188.3178 |
|                            | 75                                    | 158.33333                                         | 250       | 266.666667 | 325       | 93.867925                                 | 174.5614 | 224.64455 | 317.2897 |
|                            | 100                                   | 250                                               | 283.33333 | 325        | 391.66667 | 166.98113                                 | 225.8772 | 254.50237 | 342.5234 |
| <i>E. hitra</i>            | 0                                     | 0                                                 | 0         | 0          | 0         | 0                                         | 0        | 0         | 0        |
|                            | 25                                    | 47.619048                                         | 50        | 178.26087  | 209.09091 | 10.429448                                 | 52.17391 | 77.018634 | 78.65854 |
|                            | 50                                    | 104.7619                                          | 137.5     | 208.695652 | 250       | 63.190184                                 | 80.43478 | 164.59627 | 164.6341 |
|                            | 75                                    | 171.42857                                         | 237.5     | 265.217391 | 286.36364 | 141.71779                                 | 207.0652 | 229.81366 | 245.7317 |
|                            | 100                                   | 204.7619                                          | 266.66667 | 317.391304 | 345.45455 | 173.00613                                 | 250.5435 | 322.36025 | 325.6098 |
| <i>C. difformis</i>        | 0                                     | 0                                                 | 0         | 0          | 0         | 0                                         | 0        | 0         | 0        |
|                            | 25                                    | 19.354839                                         | 41.935484 | 63.3333333 | 66.666667 | 9.4202899                                 | 14.1844  | 55.714286 | 56.25    |
|                            | 50                                    | 74.193548                                         | 100       | 120        | 120       | 60.144928                                 | 54.60993 | 81.428571 | 82.63889 |
|                            | 75                                    | 100                                               | 125.80645 | 140        | 146.66667 | 103.62319                                 | 163.1206 | 168.57143 | 168.0556 |
|                            | 100                                   | 109.67742                                         | 125.80645 | 180        | 183.33333 | 175.36232                                 | 206.383  | 207.85714 | 212.5    |

**Table S5.** Response of superoxide dismutase, catalase, and peroxidase activity to a foliar spray of *P. hysterophorus* leaf extract of some crops and weeds.

| Test Plants                | Con.<br>(g L <sup>-1</sup> ) | Superoxide Dismutase (Unit g <sup>-1</sup> FW) |           |           |           | Catalase (μmol g <sup>-1</sup> FW) |           |           |           | Peroxidase (μmol g <sup>-1</sup> FW) |           |           |           |
|----------------------------|------------------------------|------------------------------------------------|-----------|-----------|-----------|------------------------------------|-----------|-----------|-----------|--------------------------------------|-----------|-----------|-----------|
|                            |                              | Hours after Spray                              |           |           |           | Hours after Spray                  |           |           |           | Hours after Spray                    |           |           |           |
|                            |                              | 6                                              | 24        | 48        | 72        | 6                                  | 24        | 48        | 72        | 6                                    | 24        | 48        | 72        |
| Bambara Groundnut          | 0                            | 0                                              | 0         | 0         | 0         | 0                                  | 0         | 0         | 0         | 0                                    | 0         | 0         | 0         |
|                            | 25                           | 7.6388889                                      | 30.313589 | 37.102473 | 31.468531 | 12.158809                          | 17.444717 | 20.347395 | 18.024691 | 21.311475                            | 34.567901 | 58.521561 | 54.451346 |
|                            | 50                           | 32.986111                                      | 54.355401 | 64.664311 | 63.636364 | 19.851117                          | 27.518428 | 32.258065 | 29.62963  | 32.581967                            | 54.320988 | 86.2423   | 83.229814 |
|                            | 75                           | 58.680556                                      | 69.686411 | 76.678445 | 74.125874 | 29.776675                          | 47.911548 | 58.808933 | 50.864198 | 53.893443                            | 81.481481 | 103.6961  | 99.792961 |
|                            | 100                          | 65.277778                                      | 85.365854 | 84.09894  | 81.818182 | 49.875931                          | 66.339066 | 91.563275 | 87.901235 | 78.278689                            | 98.559671 | 130.1848  | 128.98551 |
| Maize                      | 0                            | 0                                              | 0         | 0         | 0         | 0                                  | 0         | 0         | 0         | 0                                    | 0         | 0         | 0         |
|                            | 25                           | 20.257235                                      | 30.89172  | 36.129032 | 33.876221 | 11.168831                          | 14.736842 | 21.875    | 17.010309 | 14.988814                            | 23.766816 | 48.41629  | 41.723356 |
|                            | 50                           | 35.369775                                      | 47.770701 | 55.483871 | 50.488599 | 21.818182                          | 28.947368 | 51.302083 | 48.71134  | 34.004474                            | 39.237668 | 71.493213 | 66.666667 |
|                            | 75                           | 52.090032                                      | 58.917197 | 70.967742 | 68.403909 | 35.324675                          | 53.947368 | 67.708333 | 63.917526 | 45.637584                            | 70.627803 | 93.438914 | 89.569161 |
|                            | 100                          | 61.736334                                      | 76.433121 | 82.258065 | 80.781759 | 48.571429                          | 65.789474 | 89.322917 | 85.051546 | 70.246085                            | 92.152466 | 112.66968 | 107.02948 |
| <i>D. sanguinalis</i>      | 0                            | 0                                              | 0         | 0         | 0         | 0                                  | 0         | 0         | 0         | 0                                    | 0         | 0         | 0         |
|                            | 25                           | 5.75                                           | 19.298246 | 32.061069 | 39.386189 | 24.65374                           | 48.238482 | 62.021858 | 95.041322 | 29.338104                            | 48.06338  | 62.166963 | 100       |
|                            | 50                           | 11                                             | 28.070175 | 43.765903 | 61.636829 | 49.030471                          | 66.395664 | 92.076503 | 117.63085 | 55.456172                            | 69.366197 | 93.250444 | 128.67647 |
|                            | 75                           | 16.25                                          | 39.348371 | 51.653944 | 79.283887 | 66.204986                          | 90.785908 | 112.56831 | 158.12672 | 80.322004                            | 95.246479 | 116.87389 | 169.11765 |
|                            | 100                          | 22.5                                           | 48.370927 | 63.867684 | 95.140665 | 88.088643                          | 110.0271  | 150.81967 | 183.74656 | 104.65116                            | 119.01408 | 148.84547 | 209.375   |
| <i>E. indica</i>           | 0                            | 0                                              | 0         | 0         | 0         | 0                                  | 0         | 0         | 0         | 0                                    | 0         | 0         | 0         |
|                            | 25                           | 4.0106952                                      | 10.752688 | 15.549598 | 26.287263 | 22.635135                          | 33.222591 | 55.852843 | 86.148649 | 27.494908                            | 54.757282 | 81.8      | 89.558233 |
|                            | 50                           | 9.3582888                                      | 28.763441 | 34.852547 | 38.753388 | 50.337838                          | 71.096346 | 90.635452 | 123.98649 | 63.543788                            | 101.5534  | 121       | 145.98394 |
|                            | 75                           | 15.508021                                      | 34.677419 | 54.423592 | 80.216802 | 80.743243                          | 90.697674 | 128.76254 | 163.17568 | 87.372709                            | 122.71845 | 142       | 158.43373 |
|                            | 100                          | 24.59893                                       | 46.236559 | 61.126005 | 93.224932 | 106.75676                          | 134.88372 | 160.86957 | 208.78378 | 105.09165                            | 144.27184 | 170.2     | 212.04819 |
| <i>Ageratum conyzoides</i> | 0                            | 0                                              | 0         | 0         | 0         | 0                                  | 0         | 0         | 0         | 0                                    | 0         | 0         | 0         |
|                            | 25                           | 13.707165                                      | 20.9375   | 21.875    | 26.031746 | 19.090909                          | 33.108108 | 50        | 59.276018 | 33.928571                            | 54.572271 | 76.923077 | 84.955752 |
|                            | 50                           | 22.429907                                      | 28.125    | 45.3125   | 66.031746 | 27.045455                          | 48.198198 | 66.294643 | 72.850679 | 71.72619                             | 87.020649 | 116.86391 | 128.61357 |
|                            | 75                           | 41.433022                                      | 52.1875   | 62.1875   | 78.730159 | 38.636364                          | 63.963964 | 74.330357 | 120.58824 | 86.011905                            | 130.67847 | 149.70414 | 180.53097 |
|                            | 100                          | 48.286604                                      | 56.5625   | 80        | 90.793651 | 60                                 | 72.972973 | 103.34821 | 157.01357 | 122.61905                            | 168.43658 | 197.92899 | 211.20944 |
| <i>C. iria</i>             | 0                            | 0                                              | 0         | 0         | 0         | 0                                  | 0         | 0         | 0         | 0                                    | 0         | 0         | 0         |
|                            | 25                           | 13.349515                                      | 20.731707 | 32.273839 | 35.539216 | 13.468013                          | 21.92691  | 34.185304 | 60.064935 | 36.164384                            | 47.311828 | 62.162162 | 76.010782 |
|                            | 50                           | 20.873786                                      | 30.243902 | 42.05379  | 58.088235 | 28.619529                          | 47.840532 | 60.383387 | 85.714286 | 52.328767                            | 61.021505 | 114.05405 | 116.71159 |
|                            | 75                           | 26.699029                                      | 38.780488 | 54.523227 | 65.931373 | 59.259259                          | 76.744186 | 88.817891 | 128.24675 | 78.356164                            | 94.892473 | 146.21622 | 153.36927 |
|                            | 100                          | 31.796117                                      | 46.097561 | 68.215159 | 76.715686 | 73.063973                          | 93.023256 | 130.35144 | 153.57143 | 109.31507                            | 135.48387 | 183.78378 | 192.45283 |
| <i>E. hitra</i>            | 0                            | 0                                              | 0         | 0         | 0         | 0                                  | 0         | 0         | 0         | 0                                    | 0         | 0         | 0         |
|                            | 25                           | 4.7244094                                      | 11.71875  | 17.063492 | 26.587302 | 29.965157                          | 40.84507  | 60.278746 | 86.062718 | 19.075145                            | 49.002849 | 53.142857 | 56.980057 |
|                            | 50                           | 12.992126                                      | 20.703125 | 37.301587 | 48.809524 | 54.006969                          | 78.169014 | 92.334495 | 105.92334 | 49.421965                            | 87.464387 | 119.14286 | 128.77493 |
|                            | 75                           | 35.03937                                       | 50.390625 | 62.301587 | 75.396825 | 90.592334                          | 101.40845 | 114.63415 | 148.78049 | 81.50289                             | 138.46154 | 147.71429 | 150.14245 |
|                            | 100                          | 46.062992                                      | 57.8125   | 77.380952 | 89.68254  | 100                                | 128.52113 | 157.49129 | 163.76307 | 117.05202                            | 169.51567 | 194.57143 | 201.4245  |

| Test Plants         | Con.<br>(g L <sup>-1</sup> ) | Superoxide Dismutase (Unit g <sup>-1</sup> FW) |           |           |           | Catalase (μmol g <sup>-1</sup> FW) |           |           |           | Peroxidase (μmol g <sup>-1</sup> FW) |           |           |           |
|---------------------|------------------------------|------------------------------------------------|-----------|-----------|-----------|------------------------------------|-----------|-----------|-----------|--------------------------------------|-----------|-----------|-----------|
|                     |                              | Hours after Spray                              |           |           |           | Hours after Spray                  |           |           |           | Hours after Spray                    |           |           |           |
|                     |                              | 6                                              | 24        | 48        | 72        | 6                                  | 24        | 48        | 72        | 6                                    | 24        | 48        | 72        |
| <i>C. difformis</i> | 0                            | 0                                              | 0         | 0         | 0         | 0                                  | 0         | 0         | 0         | 0                                    | 0         | 0         | 0         |
|                     | 25                           | 11.552347                                      | 34.065934 | 40.727273 | 38.489209 | 14.396887                          | 15.444015 | 15.769231 | 13.899614 | 6.6666667                            | 10.245902 | 13.168724 | 9.9173554 |
|                     | 50                           | 27.797834                                      | 50.18315  | 68.363636 | 67.266187 | 37.743191                          | 41.312741 | 51.153846 | 48.262548 | 16.666667                            | 30.327869 | 41.152263 | 43.38843  |
|                     | 75                           | 44.765343                                      | 66.300366 | 77.090909 | 76.618705 | 44.357977                          | 59.459459 | 74.615385 | 72.200772 | 26.25                                | 69.262295 | 76.131687 | 76.859504 |
|                     | 100                          | 52.34657                                       | 73.992674 | 78.909091 | 78.057554 | 71.984436                          | 94.208494 | 101.53846 | 98.069498 | 52.916667                            | 84.836066 | 92.592593 | 94.628099 |
